# Supplementary material
Source: PubMed Central journal article supplement (PMC2631294)
Supplement: JCI0935958sd.pdf [file JCI0935958sd.pdf]

Supplemental Figure 1

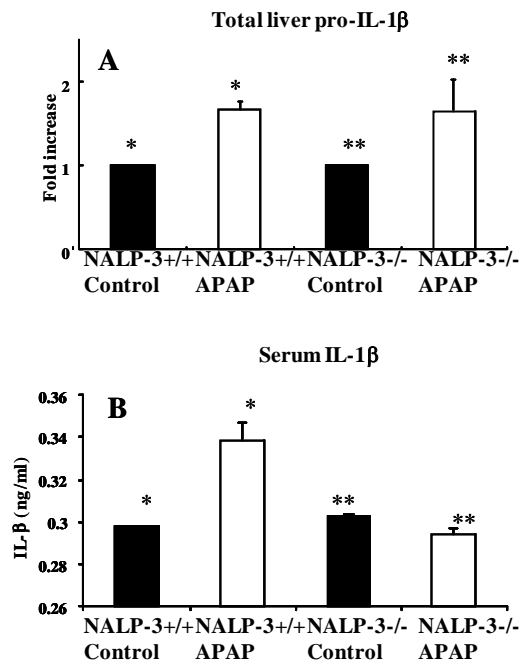

Supplemental Figure 1 Increase in liver pro-IL-1 $\beta$  mRNA but not serum IL-1 $\beta$  from NALP-3 $^{-/-}$  mice treated with APAP. (A) Treatment of NALP-3 $^{+/+}$  and NALP-3 $^{-/-}$  mice with APAP results in an increase in total liver mRNA for pro-IL-1 $\beta$  (\* P<0.04 and \*\* P<0.04). (B) Treatment of NALP-3 $^{+/+}$  but not NALP-3 $^{-/-}$  mice with APAP results in an increase in serum IL-1 $\beta$  (\* P<0.01 and \*\* P:NS).
